# Supplementary material for: The longitudinal kinetics of antibodies in COVID-19 recovered patients over 14 months
Source: bioRxiv or medRxiv preprint supplement (doi:10.1101/2021.09.16.21263693), 2021-09-21
Supplement: Supplementary file [file media-1.pdf]

## Supplementary

**a.**

|                                         |        |     |    |         |      |
|-----------------------------------------|--------|-----|----|---------|------|
| Total COVID-19 Recovered patient cohort | Age    | Max | 81 | Average | 53.5 |
|                                         |        | Min | 20 |         |      |
|                                         | Gender | M   | 38 | Total   | 82   |
|                                         |        | F   | 44 |         |      |
| F                                       | Age    | Max | 78 | Average | 53.8 |
|                                         |        | Min | 20 |         |      |
| M                                       | Age    | Max | 81 | Average | 53   |
|                                         |        | Min | 25 |         |      |

**b.**

|                                             |        |     |    |         |      |
|---------------------------------------------|--------|-----|----|---------|------|
| Follow up COVID-19 Recovered patient cohort | Age    | Max | 81 | Average | 50.5 |
|                                             |        | Min | 20 |         |      |
|                                             | Gender | M   | 47 | Total   | 90   |
|                                             |        | F   | 43 |         |      |
| F                                           | Age    | Max | 78 | Average | 49   |
|                                             |        | Min | 20 |         |      |
| M                                           | Age    | Max | 81 | Average | 53   |
|                                             |        | Min | 25 |         |      |

**c.**

|                                                                                         |        |     |    |         |    |
|-----------------------------------------------------------------------------------------|--------|-----|----|---------|----|
| Follow up COVID-19 Recovered patient cohort who received one BNT162b2 mRNA-vaccine dose | Age    | Max | 76 | Average | 48 |
|                                                                                         |        | Min | 20 |         |    |
|                                                                                         | Gender | M   | 13 | Total   | 22 |
|                                                                                         |        | F   | 9  |         |    |
| F                                                                                       | Age    | Max | 76 | Average | 48 |
|                                                                                         |        | Min | 20 |         |    |
| M                                                                                       | Age    | Max | 76 | Average | 52 |
|                                                                                         |        | Min | 28 |         |    |

d.

|                 |        |     |    |         |      |
|-----------------|--------|-----|----|---------|------|
| Naïve vaccinees | Age    | Max | 65 | Average | 43.5 |
|                 |        | Min | 22 |         |      |
|                 | Gender | M   | 4  | Total   | 17   |
|                 |        | F   | 13 |         |      |
| F               | Age    | Max | 65 | Average | 43.5 |
|                 |        | Min | 22 |         |      |
| M               | Age    | Max | 63 | Average | 46   |
|                 |        | Min | 29 |         |      |

**Table S1 | Study participant cohorts** a) COVID-19 recovered patients b) Follow up recovered patients (sub-cohort of the recovered patients). c) Follow up recovered patients that received one BNT162b2 mRNA-vaccine dose. d) Naïve vaccinees that received two doses of the BNT162b2 mRNA-vaccine.

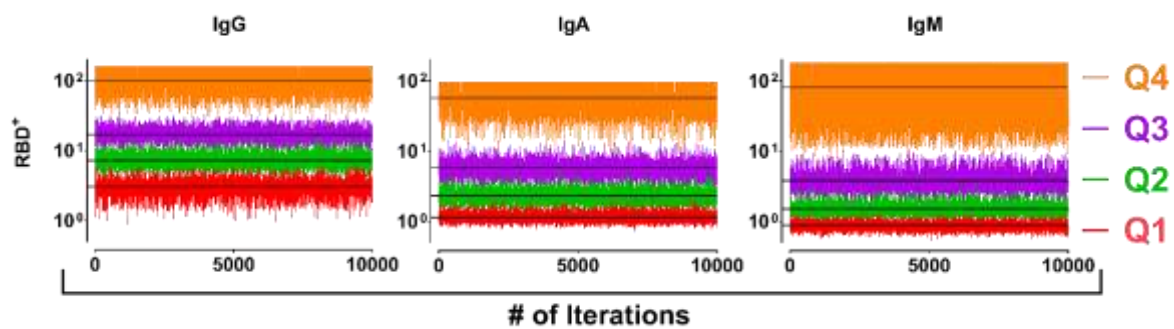

**Figure. S1 | Quartile determination utilizing bootstrap method.** RBD<sup>+</sup> antibody measured values were randomly selected (n=50) out of the extended dataset obtained from all recovered patients (n=345) and quartile thresholds were set according to the mean values derived from 10,000 iterations. Y-Axis in Log<sub>10</sub>, X-axis represent the number of iterations used in the bootstrapping procedure.

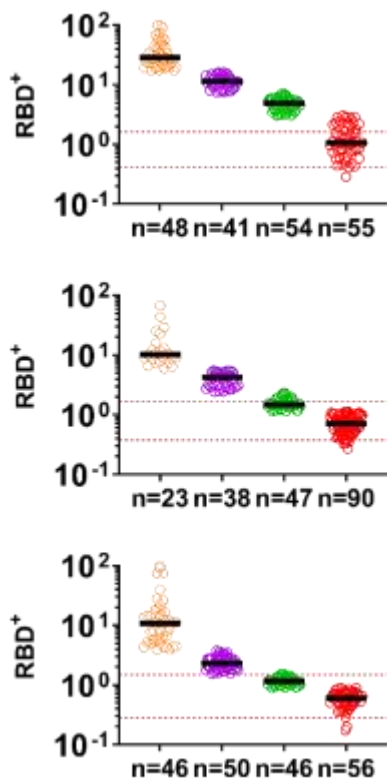

**Figure. S2 | Designation of RBD<sup>+</sup> antibody levels by quartiles.** Measured RBD<sup>+</sup> antibody levels in recovered patients were designated to their respective quartile (i.e., from low to high Q1-Q4 respectively) according to the measured antibody level at the first visit (V1). Y-axis, Log<sub>10</sub> of RBD<sup>+</sup> antibody levels. X-axis the quartile groups, n indicates the number of individuals assigned to each quartile at V1 for each isotype.
